# Supplementary material
Source: PubMed Central journal article supplement (PMC4418882)
Supplement: pnas.201501555SI.pdf [file pnas.201501555SI.pdf]

# Supporting Information

Shen et al. 10.1073/pnas.1501555112

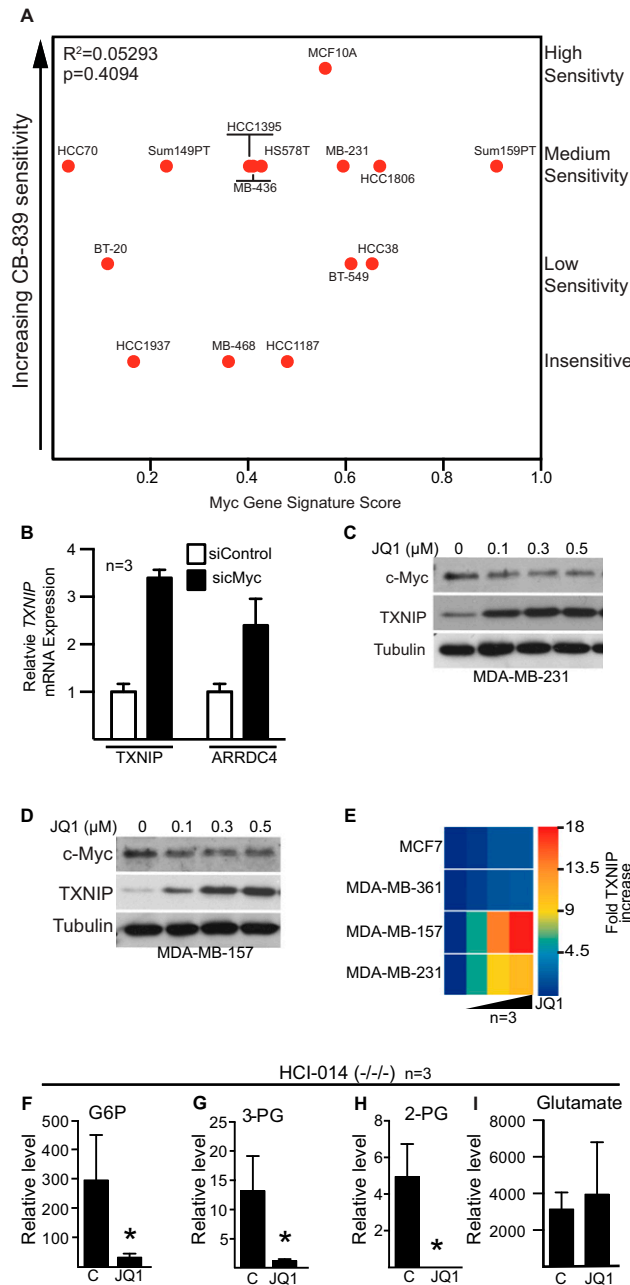

**Fig. S1.** c-Myc regulates glucose metabolism in TNBC. The  $IC_{50}$  for the GLS1 inhibitor CB-839 in the indicated TNBC cell lines were reported recently (1). We used this information to bin the cell lines into insensitive, low-sensitivity, medium-sensitivity, and high-sensitivity groups. (A) The Myc pathway score for each cell line is plotted against the sensitivity category. The Pearson's correlation coefficient is presented. (B) mRNA levels for TXNIP and its paralog ARRDC4 were determined in MDA-MB-231 cells in which we had knocked down c-Myc using a specific siRNA pool. (C and D) Levels of the indicated proteins were measured in MDA-MB-231 (C) or MDA-MB-157 (D) cells following 24-h treatment with the indicated dose of JQ1. (E) The indicated cell lines were treated with increasing concentrations of JQ1 for 24 h, and levels of TXNIP mRNA were determined by qPCR. JQ1 was used at 100, 200, and 500 nM. MCF7 and MDA-MB-361 cells are ER-positive cell lines, and MDA-MB-157 and MDA-MB-231 are TNBC cell lines. (F–I) Levels of the indicated metabolites in TN HCl-014 cells were determined following 24-h treatment with 100 nM JQ1: (F) Glucose 6-phosphate (G6P). (G) 3-Phosphoglycerate (3-PG). (H) 2-Phosphoglycerate (2-PG). (I) Glutamate. \* $P < 0.05$  as determined using *t* tests. *n*, number of independent biological replicates. In B and F–I, values are reported as means  $\pm$  SEM.

1. Gross MI, et al. (2014) Antitumor activity of the glutaminase inhibitor CB-839 in triple-negative breast cancer. *Mol Cancer Ther* 13(4):890–901.





1. van de Vijver MJ, et al. (2002) A gene-expression signature as a predictor of survival in breast cancer. *N Engl J Med* 347(25):1999–2009.
2. Cunha S, et al. (2014) The RON receptor tyrosine kinase promotes metastasis by triggering MBD4-dependent DNA methylation reprogramming. *Cell Reports* 6(1):141–154.
3. Curtis C, et al.; METABRIC Group (2012) The genomic and transcriptomic architecture of 2,000 breast tumours reveals novel subgroups. *Nature* 486(7403):346–352.

**Table S1. Myc gene signature score is inversely correlated with TXNIP**

| Features             | Myc activity score | TXNIP expression | Basal subtype |
|----------------------|--------------------|------------------|---------------|
| 0230_184A1N4.CEL     | 0.053893           | 3.273637284      | Yes           |
| 0231_184B5.CEL       | 0.20427            | 3.764303989      | Yes           |
| 0232_600MPE.CEL      | 0.057588           | 4.151907479      |               |
| 0233_AU565.CEL       | 0.55753            | 2.849166329      |               |
| 0234_BT20.CEL        | 0.11256            | 2.37280326       | Yes           |
| 0235_BT474.CEL       | 0.2072             | 4.01348457       |               |
| 0236_BT483.CEL       | 0.11121            | 3.987326175      |               |
| 0237_CAMA1.CEL       | 0.61071            | 2.401074761      |               |
| 0240_HCC38.CEL       | 0.6544             | 1.391522472      | Yes           |
| 0241_HCC70.CEL       | 0.032056           | 2.635696436      | Yes           |
| 0242_HCC202.CEL      | 0.21535            | 4.110151672      |               |
| 0243_HCC1143.CEL     | 0.27101            | 2.770793918      | Yes           |
| 0244_HCC1187.CEL     | 0.48066            | 1.027664704      | Yes           |
| 0245_HCC1395.CEL     | 0.40289            | 2.221118206      | Yes           |
| 0246_HCC1419.CEL     | 0.12898            | 3.17229511       |               |
| 0247_HCC1428.CEL     | 0.37848            | 4.008091807      |               |
| 0248_HCC1500.CEL     | 0.27735            | 1.924921055      | Yes           |
| 0249_HCC1569.CEL     | 1                  | 2.554209951      | Yes           |
| 0250_HCC1599.CEL     | 0.41077            | 3.014923564      | Yes           |
| 0251_HCC1806.CEL     | 0.67017            | 2.606612601      | Yes           |
| 0252_HCC1937.CEL     | 0.16583            | 2.512470139      | Yes           |
| 0254_HCC1954.CEL     | 0.12074            | 2.637075297      | Yes           |
| 0255_HCC2185.CEL     | 0.28045            | 4.557883171      |               |
| 0256_HCC2218.CEL     | 0.53406            | 4.192826589      |               |
| 0257_HCC3153.CEL     | 0.28253            | 2.850060709      | Yes           |
| 0258_HS578T.CEL      | 0.42726            | 0.862854758      | Yes           |
| 0259_LY2.CEL         | 0.61663            | 3.478641548      |               |
| 0260_MCF12A.CEL      | 0.26836            | 4.707135732      | Yes           |
| 0261_MCF10F.CEL      | 0                  | 4.270999057      | Yes           |
| 0262_MCF7.CEL        | 0.3572             | 3.983257016      |               |
| 0263_MDAMB134VI.CEL  | 0.36319            | 3.66079438       |               |
| 0264_MDAMB157.CEL    | 0.28879            | 2.453057844      | Yes           |
| 0265_MDAMB175VII.CEL | 0.060662           | 4.468485715      |               |
| 0266_MDAMB231.CEL    | 0.59468            | 3.277613132      | Yes           |
| 0267_MDAMB361.CEL    | 0.14122            | 4.48608463       |               |
| 0268_MDAMB415.CEL    | 0.036587           | 4.33778991       |               |
| 0270_MDAMB436.CEL    | 0.41037            | 3.150915083      | Yes           |
| 0271_MDAMB453.CEL    | 0.4078             | 3.656637042      |               |
| 0272_MDAMB468.CEL    | 0.35987            | 0.015370095      | Yes           |
| 0273_SKBR3.CEL       | 0.46557            | 3.305554696      |               |
| 0274_SUM44PE.CEL     | 0.126              | 3.461155314      |               |
| 0279_SUM52PE.CEL     | 0.10918            | 3.881067976      |               |
| 0280_SUM102PT.CEL    | 0.038143           | 4.803066399      | Yes           |
| 0281_SUM149PT.CEL    | 0.23316            | 3.676752537      | Yes           |
| 0282_SUM159PT.CEL    | 0.90924            | 2.640375006      | Yes           |
| 0283_SUM185PE.CEL    | 0.2409             | 4.01152638       |               |
| 0284_SUM225CWN.CEL   | 0.053279           | 4.710603629      |               |
| 0285_SUM1315MO2.CEL  | 0.63499            | 1.20094254       | Yes           |
| 0286_T47D.CEL        | 0.32144            | 2.796718678      |               |
| 0287_UACC812.CEL     | 0.30471            | 3.739129287      |               |
| 0288_UACC893.CEL     | 0.10114            | 2.558834297      |               |
| 0289_ZR751.CEL       | 0.38406            | 4.258730651      |               |
| 0290_ZR7530.CEL      | 0.049989           | 4.121688422      |               |
| 0291_ZR75B.CEL       | 0.82359            | 3.601617         |               |
| 0293_BT549.CEL       | 0.61104            | 1.989558963      | Yes           |
| 0294_MCF10A.CEL      | 0.55842            | 3.074354649      | Yes           |

Myc activity as measured by gene signature score was determined in the listed breast cancer cell lines using the procedures described in *Materials and Methods*. TXNIP expression levels in each cell line are listed, and whether the cell lines are of the basal intrinsic subtype is stated.
